# Supplementary material for: Improving the thermoelectric performance of p-type (BixSb1−x)2Te3 thin films via tuning the BixSb1−x layer
Source: Royal Society of Chemistry journal article supplement (doi:10.1039/d4ta03552f), 2024-01-01
Supplement: d4ta03552f1.pdf [file d4ta03552f1.pdf]

## Improving the thermoelectric performance of p-type $(\text{Bi}_x\text{Sb}_{1-x})_2\text{Te}_3$ thin films via tuning $\text{Bi}_x\text{Sb}_{1-x}$ layer

Hang Ju<sup>1,a,‡</sup>, Beibei Zhu<sup>1,a,\*‡</sup>, Wenya Wang<sup>a</sup>, Lili Chen<sup>a</sup>, Xianfeng Ni<sup>b,\*</sup>, Li Tao<sup>a,\*</sup>

<sup>a</sup> School of Materials Science and Engineering, Jiangsu Key Laboratory of Advanced Metallic Materials, Southeast University, Nanjing 211189, People's Republic of China.

E-mail: tao@seu.edu.cn, 101012333@seu.edu.cn

<sup>b</sup> Institute for Next Generation Semiconductor Materials, Southeast University, Suzhou 215123, People's Republic of China. E-mail: 103200036@seu.edu.cn

‡ H.J. and B.Z. contributed equally to this work

Table S1 The abbreviation of the investigated samples

| Sample abbreviation | Thin film                                   | Synthesis process                       |
|---------------------|---------------------------------------------|-----------------------------------------|
| as-grown-BS         | $\text{Bi}_x\text{Sb}_{1-x}$                | Electron beam evaporation (EBE)         |
| an-100-BS           | $\text{Bi}_x\text{Sb}_{1-x}$                | EBE+annealing under 100°C               |
| an-150-BS           | $\text{Bi}_x\text{Sb}_{1-x}$                | EBE+annealing under 150°C               |
| an-200-BS           | $\text{Bi}_x\text{Sb}_{1-x}$                | EBE+annealing under 200°C               |
| as-grown-BST        | $(\text{Bi}_x\text{Sb}_{1-x})_2\text{Te}_3$ | EBE+thermally-assisted conversion (TAC) |
| an-100-BST          | $(\text{Bi}_x\text{Sb}_{1-x})_2\text{Te}_3$ | EBE+annealing under 100°C+TAC           |
| an-150-BST          | $(\text{Bi}_x\text{Sb}_{1-x})_2\text{Te}_3$ | EBE+annealing under 150°C+TAC           |
| an-200-BST          | $(\text{Bi}_x\text{Sb}_{1-x})_2\text{Te}_3$ | EBE+annealing under 200°C+TAC           |

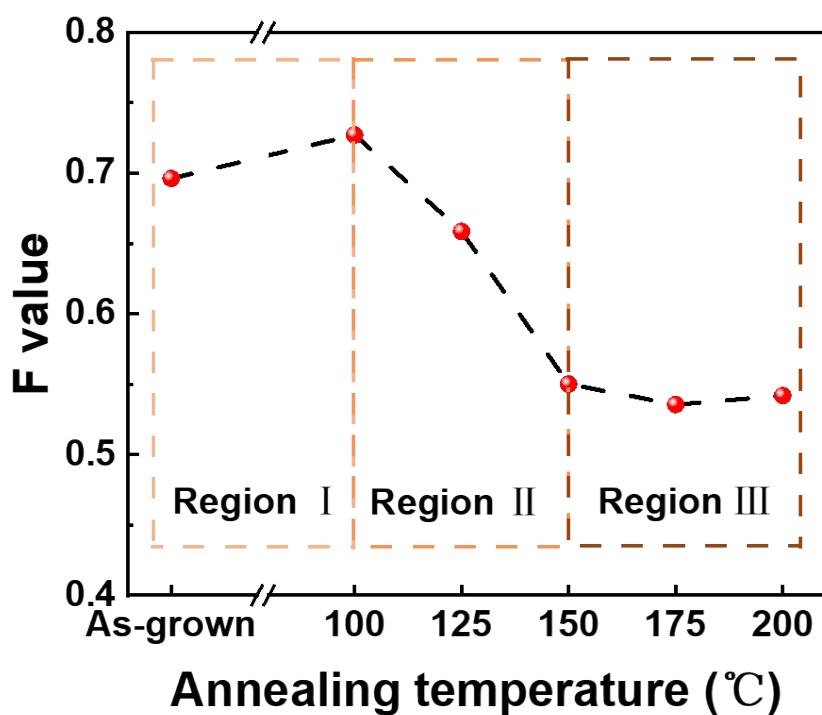

Figure S1 F values of the  $(\text{Bi}_x\text{Sb}_{1-x})_2\text{Te}_3$  thin films under different annealing temperatures

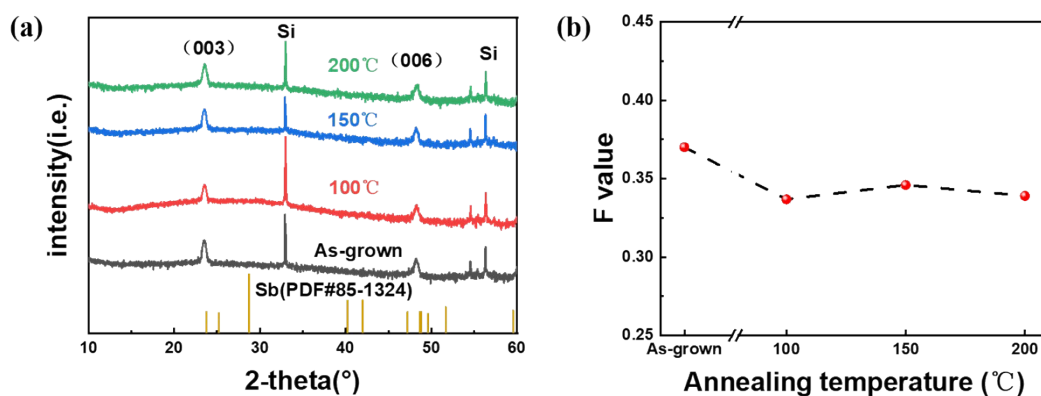

Figure S2 (a) XRD patterns and (b) F values of  $\text{Bi}_x\text{Sb}_{1-x}$  annealed at different annealing temperatures

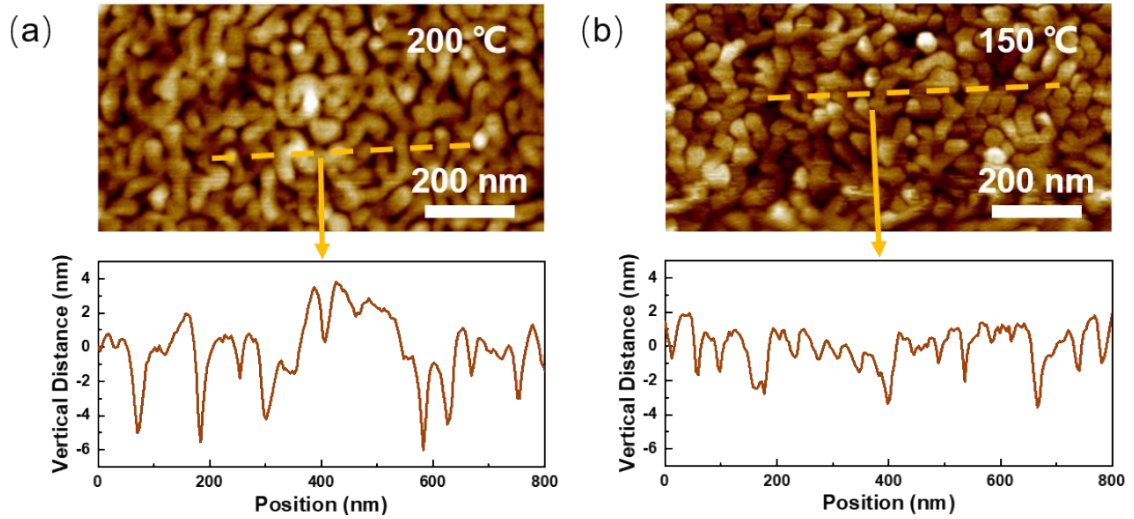

Figure S3 AFM images of  $\text{Bi}_x\text{Sb}_{1-x}$  annealed at different temperatures (a) 200 °C and (b) 150 °C

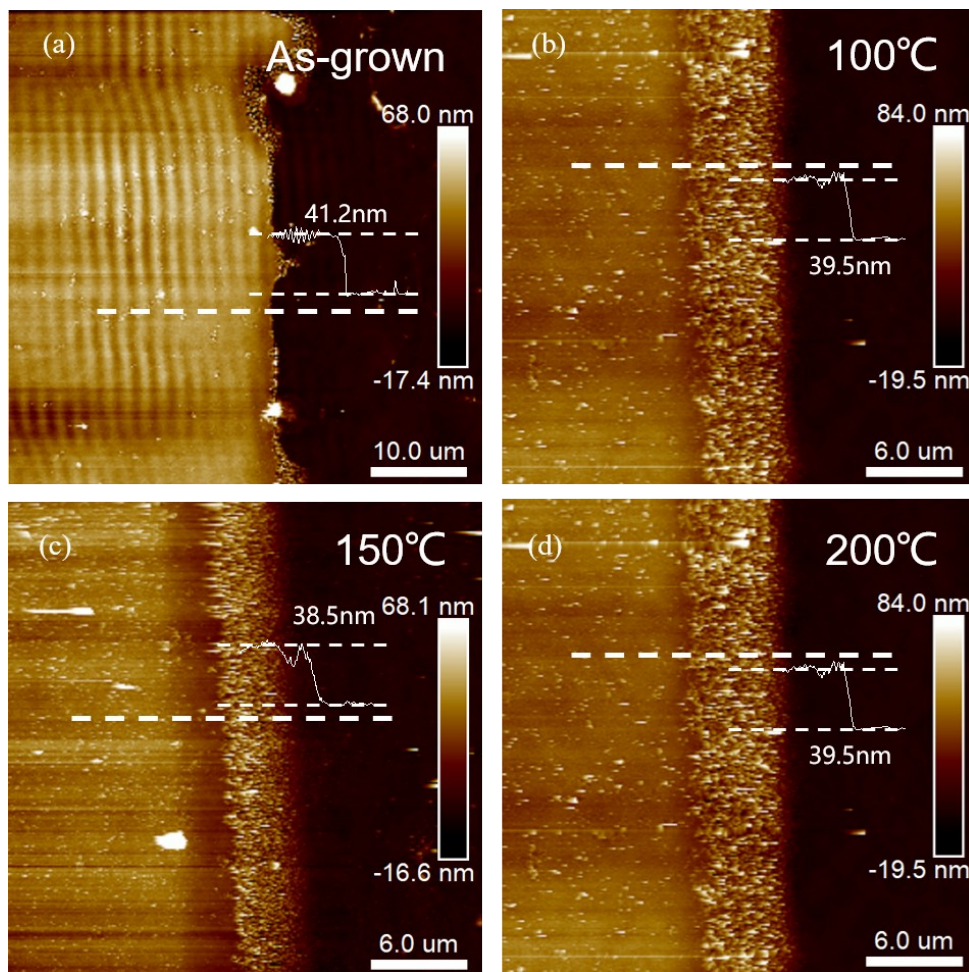

Figure S4 AFM images of the thickness of  $(\text{Bi}_x\text{Sb}_{1-x})_2\text{Te}_3$  processed at different annealing temperatures

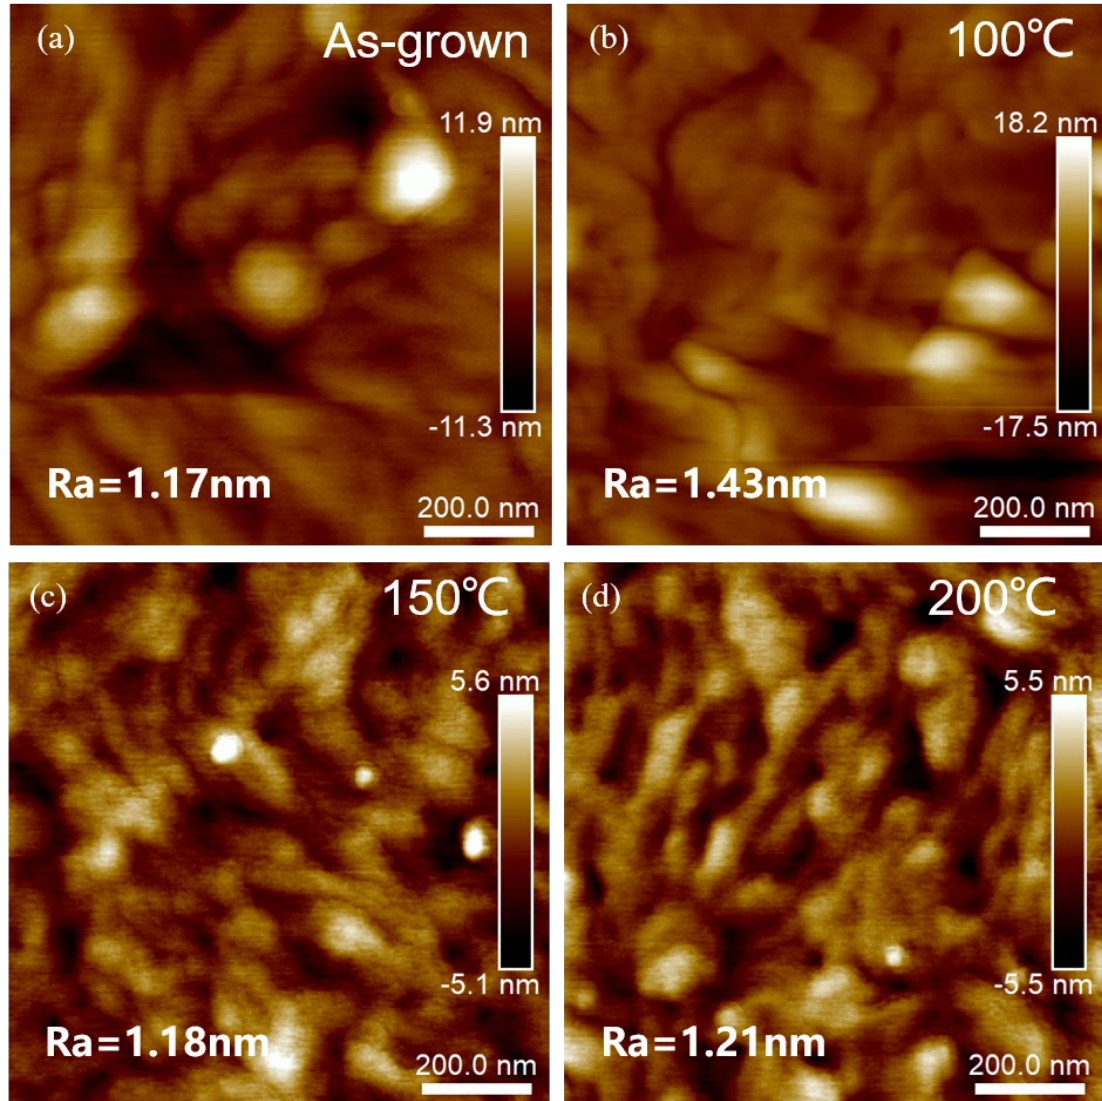

Figure S5 AFM images of the roughness of  $(\text{Bi}_x\text{Sb}_{1-x})_2\text{Te}_3$  processed at different annealing temperatures

Table S2 FWHM and crystalline size of  $(\text{Bi}_x\text{Sb}_{1-x})_2\text{Te}_3$  processed at different annealing temperatures

| Annealing temperature | (0 0 6)  |                       | (0 0 15) |                       | Average size (nm) |
|-----------------------|----------|-----------------------|----------|-----------------------|-------------------|
|                       | FWHM (°) | Crystalline size (nm) | FWHM (°) | Crystalline size (nm) |                   |
| As-grown              | 0.219    | 41.2                  | 0.289    | 31.7                  | 36.5              |
| 100°C                 | 0.209    | 43.7                  | 0.286    | 32                    | 37.9              |
| 150°C                 | 0.241    | 36.6                  | 0.298    | 30.6                  | 33.6              |
| 200°C                 | 0.227    | 39.4                  | 0.335    | 25.2                  | 32.3              |

Table S3 Atomic composition of  $\text{Bi}_x\text{Sb}_{1-x}$  annealed at different temperatures

| Temperature | Bi (at.%) | Sb (at.%) |
|-------------|-----------|-----------|
| As-grown    | 2.36      | 97.64     |
| 100°C       | 1.74      | 98.26     |
| 150°C       | 2.99      | 97.01     |
| 200°C       | 0.36      | 99.64     |

Table S4 The room temperature electrical transport properties of  $(\text{Bi}_x\text{Sb}_{1-x})_2\text{Te}_3$  processed at different annealing temperatures

| Annealing temperature | S ( $\mu\text{V K}^{-1}$ ) | $n_H 10^{19}(\text{cm}^{-3})$ | $\mu (\text{cm}^2 \text{V}^{-1} \text{s}^{-1})$ | $m_d^* (m_0)$ | $E_F (\text{meV})$ |
|-----------------------|----------------------------|-------------------------------|-------------------------------------------------|---------------|--------------------|
| As-grown              | 124.6                      | 4.26                          | 249.4                                           | 0.857         | 42.4               |
| 100°C                 | 141.2                      | 3.77                          | 254.1                                           | 0.943         | 31.3               |
| 150°C                 | 148.5                      | 3.05                          | 259.6                                           | 0.881         | 27.0               |
| 200°C                 | 151.5                      | 5.43                          | 154.3                                           | 1.303         | 25.5               |

The density of states effective mass ( $m_d^*$ ) is obtained from the Pisaranko plot in Figure 5(c) based on the SPB model. The equations are in the following:

$$S(\eta) = \frac{k_B}{e} \cdot \left[ \frac{\left(\lambda + \frac{5}{2}\right) \cdot F_{\lambda + \frac{3}{2}}(\eta)}{\left(\lambda + \frac{3}{2}\right) \cdot F_{\lambda + \frac{1}{2}}(\eta)} - \eta \right] \#(1)$$

$$n_H = \frac{1}{e \cdot R_H} = \frac{(2m_d^* \cdot k_B T)^{\frac{3}{2}}}{3\pi^2 \hbar^3} \cdot \left[ \frac{\left(\lambda + \frac{3}{2}\right)^2 \cdot F_{\lambda + \frac{1}{2}}(\eta)}{\left(2\lambda + \frac{3}{2}\right) \cdot F_{\lambda + \frac{1}{2}}(\eta)} \right] \#(2)$$

$$F_i(\eta) = \int_0^\infty \frac{x^i}{1 + e^{x-\eta}} dx \#(3)$$

Where  $\eta$  is the reduced Fermi level,  $k_B$  is the Boltzmann constant,  $e$  is the electron charge,  $\lambda$  is the carrier scattering factor ( $\lambda = -1/2$  for acoustic phonon scattering),  $R_H$  is the Hall coefficient,  $m_d^*$  is the effective mass,  $\hbar$  is the reduced Plank constant,  $F_i(\eta)$  is the Fermi integral.



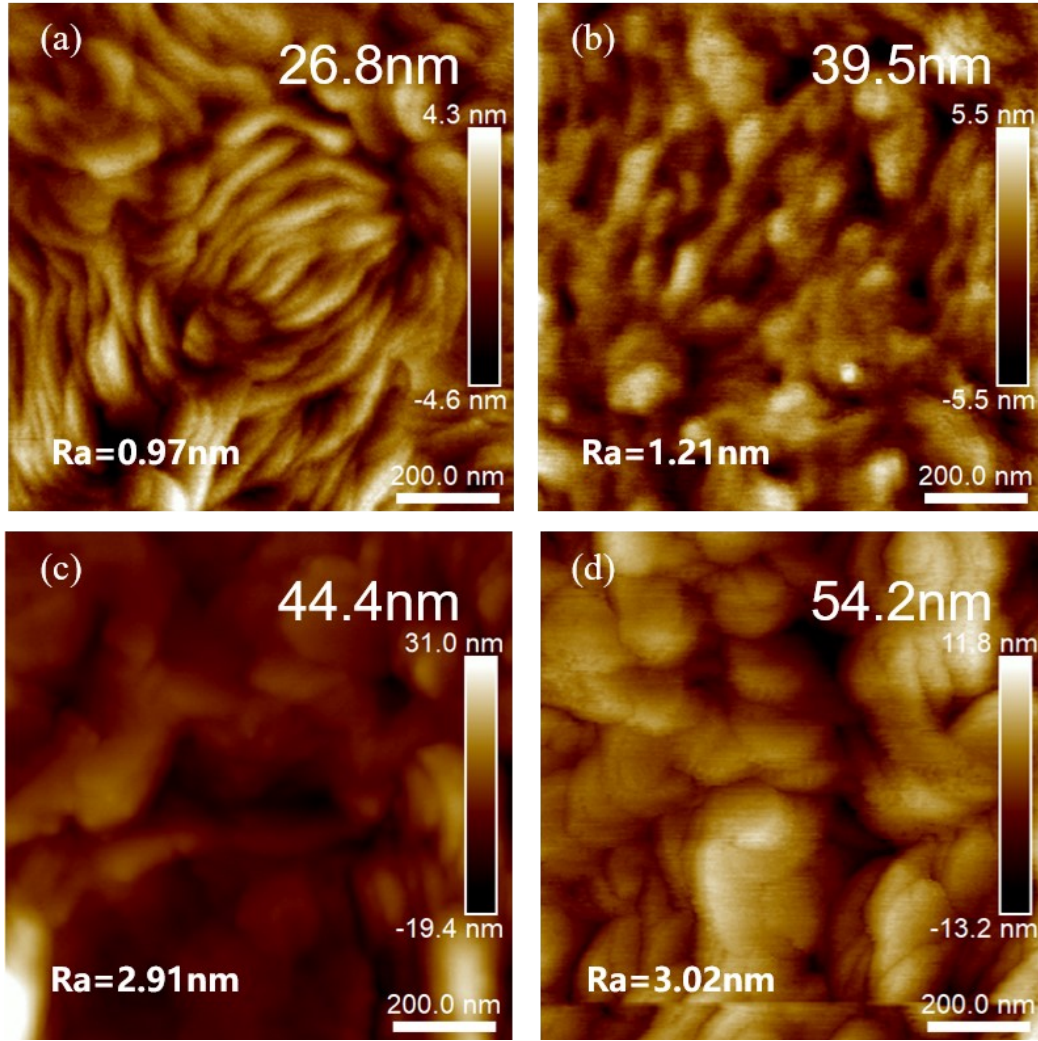

Figure S6 AFM images of the thickness of  $(\text{Bi}_x\text{Sb}_{1-x})_2\text{Te}_3$  with different thickness

Table S5 FWHM and crystalline size of  $(\text{Bi}_x\text{Sb}_{1-x})_2\text{Te}_3$  with different thickness

| Thickness | (0 0 6)           |                       | (0 0 15)          |                       | Average size (nm) |
|-----------|-------------------|-----------------------|-------------------|-----------------------|-------------------|
|           | FWHM ( $^\circ$ ) | Crystalline size (nm) | FWHM ( $^\circ$ ) | Crystalline size (nm) |                   |
| 26.8nm    | 0.291             | 29.4                  | 0.384             | 23.2                  | 26.3              |
| 39.5nm    | 0.227             | 39.4                  | 0.335             | 25.2                  | 32.3              |
| 44.4nm    | 0.211             | 43.4                  | 0.298             | 30.6                  | 37.0              |
| 54.2nm    | 0.155             | 68.0                  | 0.238             | 39.8                  | 53.9              |

Table S6 The room temperature electrical transport properties of  $(\text{Bi}_x\text{Sb}_{1-x})_2\text{Te}_3$  with different thickness

| Thickness | S ( $\mu\text{V K}^{-1}$ ) | $n_{\text{H}} 10^{19}(\text{cm}^{-3})$ | $\mu (\text{cm}^2 \text{V}^{-1} \text{s}^{-1})$ | $m_{\text{d}}^* (m_0)$ | $E_{\text{F}} (\text{meV})$ |
|-----------|----------------------------|----------------------------------------|-------------------------------------------------|------------------------|-----------------------------|
| 26.8nm    | 116.3                      | 4.10                                   | 131.4                                           | 0.763                  | 48.6                        |
| 39.5nm    | 151.5                      | 5.43                                   | 154.3                                           | 1.303                  | 26.6                        |

|        |       |      |       |       |      |
|--------|-------|------|-------|-------|------|
| 44.4nm | 150.4 | 4.34 | 184.4 | 1.132 | 26.1 |
| 54.2nm | 145.8 | 5.84 | 190.5 | 1.317 | 28.8 |

---

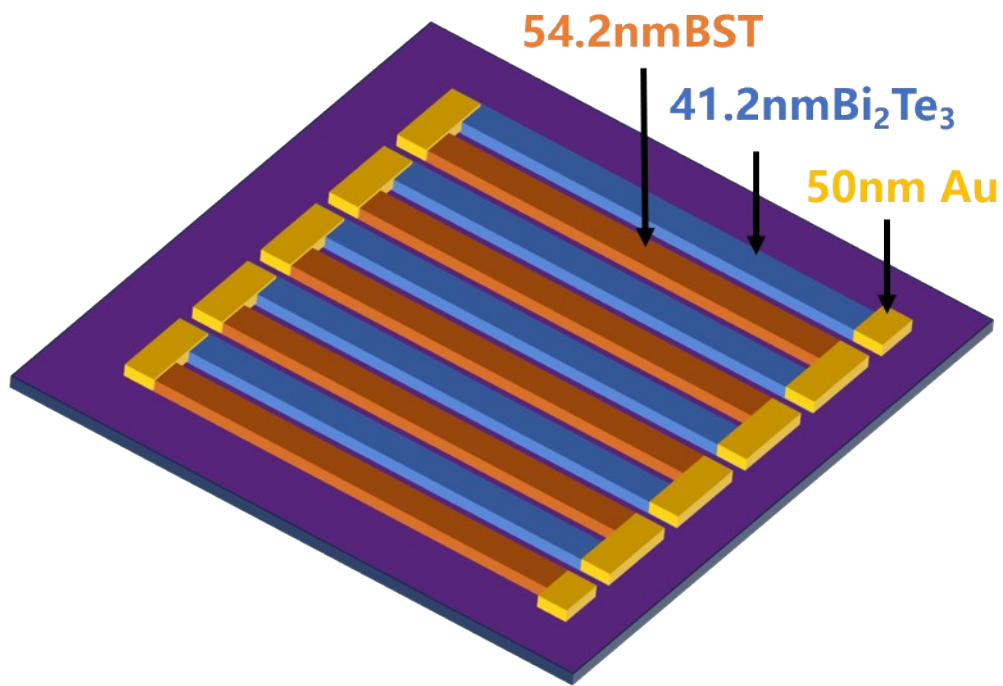

Figure S7 Schematic diagram of the structure of the thermoelectric device
